# Supplementary material for: Molecular dynamics simulations and statistical coupling analysis of GPI12 in L. major : functional co-evolution and conservedness reveals potential drug–target sites
Source: Royal Society of Chemistry journal article supplement (doi:10.1039/c4mb00649f), 2015-01-12
Supplement: c4mb00649f1.pdf [file c4mb00649f1.pdf]

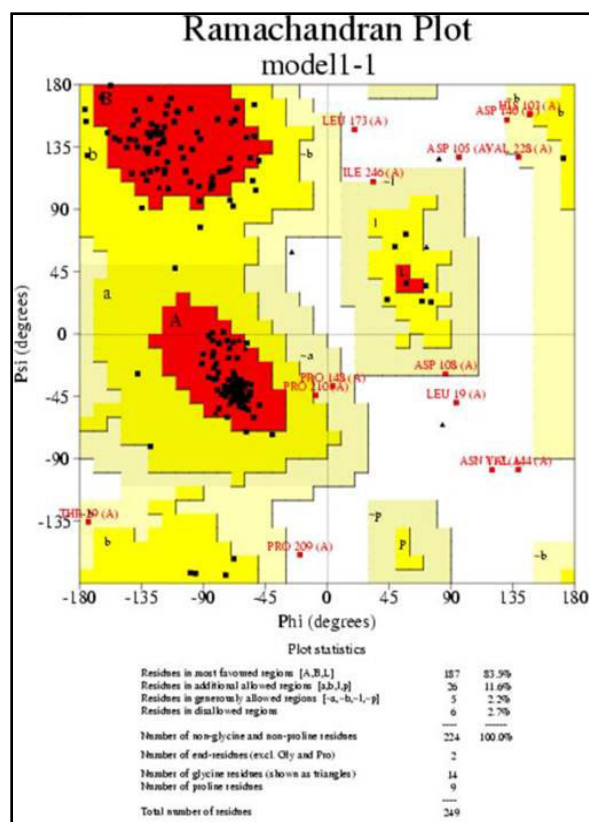

(a)

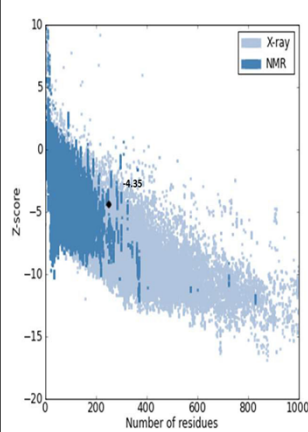

(b)

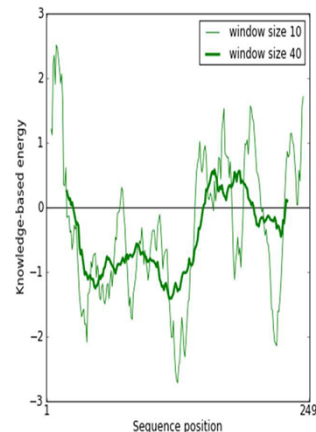

(c)

**Figure S1:** (a) Ramchandran plot of the modeled protein showed 97.7% residues in the allowed region, (b) The Z-score of -4.35 (c) The sequence position graph with a stretch of structure in the desired range.

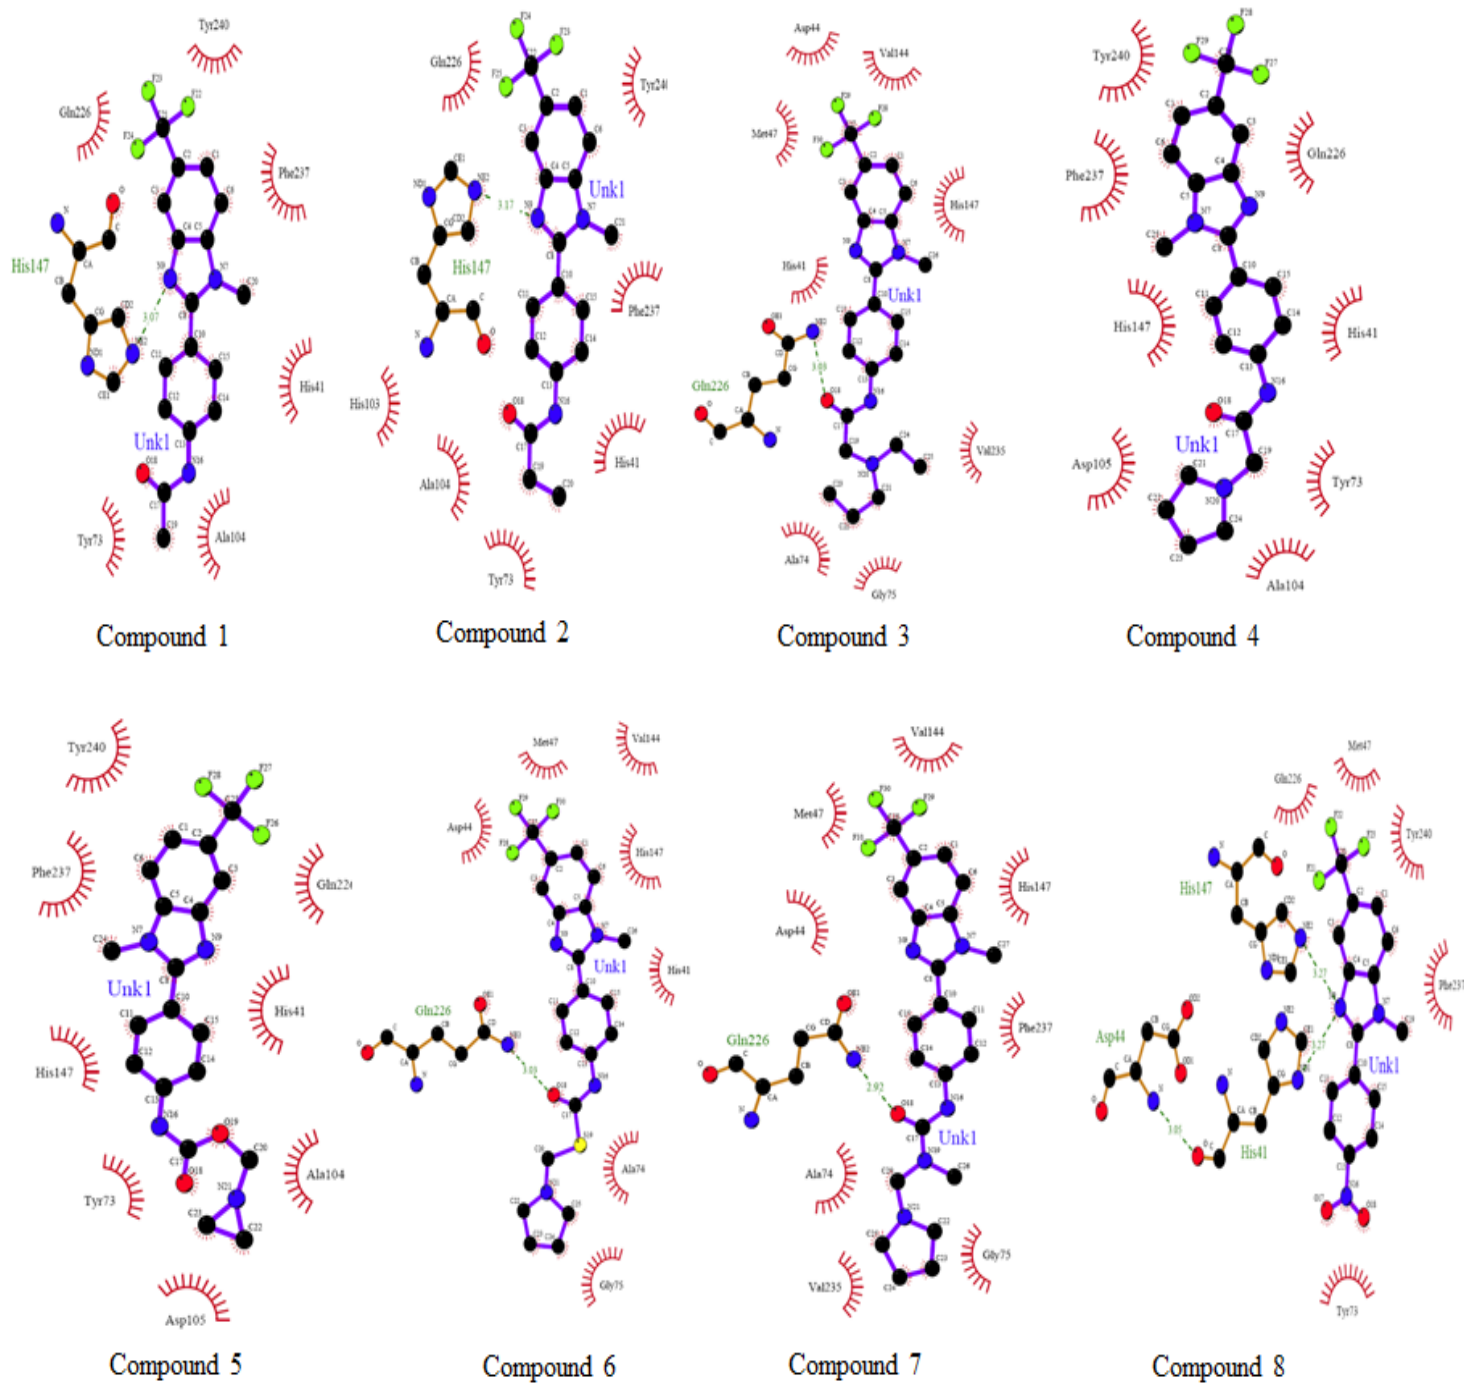

**Figure S2 (a)-(h):** Two dimensional plot of Protein-ligand interaction.

### Supplementary Tables

| Sr.no | aa residue         | Entropy | Sr.no | aa residue         | Entropy |
|-------|--------------------|---------|-------|--------------------|---------|
| 1.    | His <sup>14</sup>  | 3.05    | 19.   | Gly <sup>67</sup>  | 2.07    |
| 2.    | Cys <sup>41</sup>  | 3.26    | 20.   | Asp <sup>86</sup>  | 2.57    |
| 3.    | Glu <sup>58</sup>  | 3.32    | 21.   | Thr <sup>140</sup> | 2.72    |
| 4.    | Trp <sup>92</sup>  | 3.79    | 22.   | Phe <sup>141</sup> | 2.86    |
| 5.    | His <sup>149</sup> | 3.13    | 23.   | Asp <sup>142</sup> | 2.55    |
| 6.    | His <sup>152</sup> | 3.40    | 24.   | Gly <sup>145</sup> | 2.69    |
| 7.    | Trp <sup>234</sup> | 3.44    | 25.   | Ser <sup>147</sup> | 2.19    |
| 8.    | Ala <sup>13</sup>  | 2.27    | 26.   | Asn <sup>151</sup> | 2.75    |
| 9.    | Pro <sup>15</sup>  | 2.76    | 27.   | Lys <sup>176</sup> | 2.68    |
| 10.   | Asp <sup>16</sup>  | 2.69    | 28.   | Tyr <sup>177</sup> | 2.98    |
| 11.   | Asp <sup>17</sup>  | 2.73    | 29.   | Met <sup>224</sup> | 2.82    |
| 12.   | Glu <sup>18</sup>  | 2.9     | 30.   | His <sup>228</sup> | 2.37    |
| 13.   | Met <sup>20</sup>  | 2.92    | 31.   | Gln <sup>231</sup> | 2.98    |
| 14.   | Phe <sup>21</sup>  | 2.49    | 32.   | Phe <sup>235</sup> | 2.02    |
| 15.   | Phe <sup>22</sup>  | 2.47    | 33.   | Arg <sup>236</sup> | 2.15    |
| 16.   | Pro <sup>24</sup>  | 2.63    | 34.   | Tyr <sup>254</sup> | 2.61    |
| 17.   | Gly <sup>52</sup>  | 2.34    | 35.   | Asn <sup>249</sup> | 2.40    |
| 18.   | Arg <sup>55</sup>  | 2.93    |       |                    |         |

**Table S1:** The co-evolving residues with >2.0 relative entropy lying within the active site and in the vicinity of the active site.

| Target protein                                                                 | PDB_ID | aa length | Fold    | Resolution (Å) | Organism                  |
|--------------------------------------------------------------------------------|--------|-----------|---------|----------------|---------------------------|
| Hypothetical protein Rv1170 (MshB)                                             | 1Q7T   | 328       | A/B     | 1.90           | <i>M. tuberculosis</i>    |
| Hypothetical protein TT1542 (TT1542)                                           | 1UAN   | 227       | A/B     | 2.00           | <i>T. thermophilus</i>    |
| LMBE-related protein (BcZBP)                                                   | 2IXD   | 242       | A/B     | 1.8            | <i>B. cereus</i>          |
| N-Acyl glm pseudo-teicoplanin deacetylase                                      | 2XAD   | 273       | A/B/C/D | 1.7            | <i>A. teichomyceticus</i> |
| Pseudoaglycone deacetylase (Dbv21)                                             | 3DFI   | 270       | A       | 2.10           | <i>A. teichomyceticus</i> |
| Teicoplanin pseudoaglycone deacetylase orf2                                    | 3DFM   | 273       | A       | 2.01           | <i>A. teichomyceticus</i> |
| 1D-myo-inositol 2-acetamido-2-deoxy-alpha-D-glucopyranoside Deacetylase (MshB) | 1Q74   | 303       | A/B/C/D | 1.70           | <i>M. tuberculosis</i>    |
| deacetylase-bog complex                                                        | 2X9L   | 273       | A       | 1.73           | <i>A. teichomyceticus</i> |
| Teicoplanin pseudoaglycone deacetylases Orf2                                   | 3DFF   | 273       | A       | 1.60           | <i>A. teichomyceticus</i> |
| Teicoplanin pseudoaglycone deacetylase Orf2                                    | 3DFK   | 273       | A       | 1.60           | <i>A. teichomyceticus</i> |

**Table S2: Crystal structures used in the experiment**
